# Supplementary material for: Predictors of Recurrence After Curative Surgery for Stage I Colon Cancer: Retrospective Cohort Analysis of the Italian Society of Surgical Oncology Colorectal Cancer Network Collaborative Group
Source: PubMed Central journal article supplement — Ann Surg Open. 2024 Nov 18;5(4):e510. doi: 10.1097/AS9.0000000000000510 (PMC11661724; doi:10.1097/as9.0000000000000510), 2024-11-18

## Supplemental Online Content

Turri G, Martinelli L, Rega D et al. Predictors of recurrence after curative surgery for stage I colon cancer. Retrospective cohort analysis of the Italian Society of Surgical Oncology Colorectal Cancer Network Collaborative Group.

**Corresponding author.** Prof. Corrado Pedrazzani, Division of General and Hepatobiliary Surgery, Department of Engineering for Innovation Medicine, Verona University Hospital, Piazzale L. Scuro 10, 37134 Verona, Italy. Tel: ++39 (0)45 8126719; Fax: ++39 (0)45 8027426; E-mail: [corrado.pedrazzani@univr.it](mailto:corrado.pedrazzani@univr.it)  
**ORCID ID:** [0000-0003-2431-6117](https://orcid.org/0000-0003-2431-6117)

### Index

#### Supplementary Figures and Tables

|                        |               |
|------------------------|---------------|
| Supplementary Table 1  | <i>pag. 2</i> |
| Supplementary Table 2  | <i>pag. 2</i> |
| Supplementary Table 3  | <i>pag. 3</i> |
| Supplementary Figure 1 | <i>pag. 4</i> |
| Supplementary Figure 2 | <i>pag. 5</i> |
| Supplementary Figure 3 | <i>pag. 6</i> |
| Supplementary Figure 4 | <i>pag. 7</i> |

**Supplementary Table 1.** Frequency of sites of recurrence and corresponding treatment.

| Site of Recurrence       | N (%)      | Treatment of recurrence (%) |          |            |           |
|--------------------------|------------|-----------------------------|----------|------------|-----------|
|                          |            | CHT                         | RT       | Surgery    | Missing   |
| Liver                    | 35 (43.8%) | 9 (25.7%)                   | 1 (2.9%) | 18 (51.4%) | 7 (20.0%) |
| Lung                     | 13 (16.3%) | 5 (38.5%)                   | 1 (7.7%) | 3 (23.1%)  | 4 (30.8%) |
| Locoregional/Anastomosis | 8 (10.0%)  | 0 (0.0%)                    | 0 (0.0%) | 7 (87.5%)  | 1 (12.5%) |
| Peritoneal/Ovary         | 2 (2.5%)   | 0 (0.0%)                    | 0 (0.0%) | 2 (100.0%) | 0 (0.0%)  |
| Multiple Sites           | 8 (10.0%)  | 6 (75.0%)                   | 0 (0.0%) | 1 (12.5%)  | 1 (12.5%) |
| Other/Unknown            | 14 (17.5%) | 1 (7.1%)                    | 1 (7.1%) | 7 (50.0%)  | 5 (35.7%) |

**Supplementary Table 2.** Influence of individual, tumor and surgical characteristics on tumor recurrence in the first 2 years of follow-up. Hazard ratios and p values were obtained by univariable and multivariable Cox regression model.

| Characteristics                 | Unadjusted Haz. Ratio<br>[95% conf. interval] | Unadjusted p-value | Adjusted Haz. ratio<br>[95% conf. interval] | Adjusted p-value |
|---------------------------------|-----------------------------------------------|--------------------|---------------------------------------------|------------------|
| Gender (Women vs Men)           | 0.66 (0.36-1.18)                              | 0.162              | 0.73 (0.36-1.48)                            | 0.382            |
| Age                             | 0.80 (0.56-1.14)                              | 0.223              | 0.98 (0.95-1.02)                            | 0.357            |
| Charlson index                  |                                               |                    |                                             |                  |
| Score<4                         | 1 (reference)                                 |                    | 1 (reference)                               |                  |
| Score>4                         | 1.16 (0.65-2.09)                              | 0.614              | 0.96 (0.40-2.27)                            | 0.919            |
| Missing                         | 1.15 (0.34-3.87)                              | 0.817              | 0.51 (0.13-2.04)                            | 0.340            |
| pT (pT2 vs pT1)                 | 4.43 (1.88-10.41)                             | <b>0.001</b>       | 2.84 (1.05-7.71)                            | <b>0.040</b>     |
| Tumor diameter                  |                                               |                    |                                             |                  |
| ≤20 mm                          | 1 (reference)                                 |                    | 1 (reference)                               |                  |
| 21-30 mm                        | 3.09 (0.97-9.84)                              | 0.057              | 2.47 (0.60-10.15)                           | 0.209            |
| 31-40 mm                        | 3.08 (0.93-10.22)                             | 0.066              | 3.24 (0.90-12.97)                           | 0.097            |
| >40 mm                          | 5.41 (1.74-16.77)                             | <b>0.003</b>       | 5.73 (1.51-21.78)                           | <b>0.010</b>     |
| Missing                         | 3.32 (1.09-10.07)                             | <b>0.034</b>       | 2.65 (0.67-10.53)                           | 0.166            |
| LVI (Yes vs No)                 | 2.37 (1.22-4.61)                              | <b>0.011</b>       | 2.38 (1.15-4.91)                            | <b>0.019</b>     |
| CEA level (>5 vs ≤5)            | 2.58 (1.22-5.44)                              | <b>0.013</b>       | 3.19 (1.28-7.95)                            | <b>0.013</b>     |
| Missing                         | 1.03 (0.54-1.96)                              | 0.926              | 1.11 (0.49-2.53)                            | 0.800            |
| Nodes Retrieved >12 (Yes vs No) | 0.62 (0.33-1.19)                              | 0.150              | 0.31 (0.15-0.65)                            | <b>0.002</b>     |
| Type of resection Partial       | 2.99 (1.34-6.66)                              | <b>0.007</b>       | 1.47 (0.34-6.44)                            | 0.607            |

**Supplementary Table 3.** Collinearity Diagnostics of variables included in multivariable proportional hazards Cox model. Low variance inflation factors are indicative of absence of multicollinearity in our multivariable model.

| <b>Variable</b>          | <b>VIF</b> |
|--------------------------|------------|
| <b>Gender</b>            | 1.01       |
| <b>Age</b>               | 1.27       |
| <b>Charlson index</b>    | 1.26       |
| <b>pT</b>                | 1.05       |
| <b>Tumor diameter</b>    | 1.05       |
| <b>LVI</b>               | 1.01       |
| <b>CEA</b>               | 1.03       |
| <b>Nodes retrieved</b>   | 1.04       |
| <b>Type of resection</b> | 1.01       |

**Supplementary Figure 1.** PRISMA flow-chart illustrating data collection and selection.

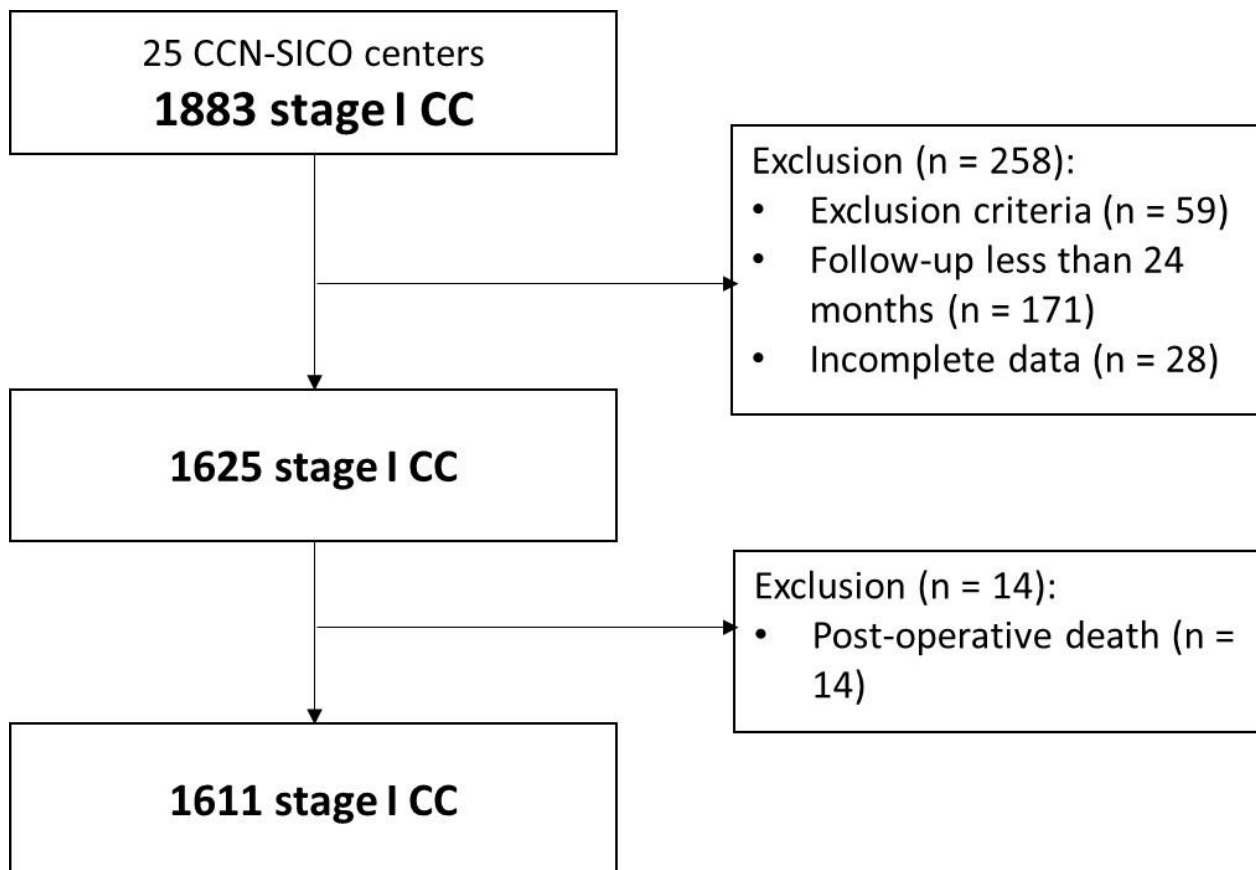

**Supplementary Figure 2.** Kaplan-Meier estimates of OS for patients with and without colorectal cancer recurrence ( $p < 0.001$ ).

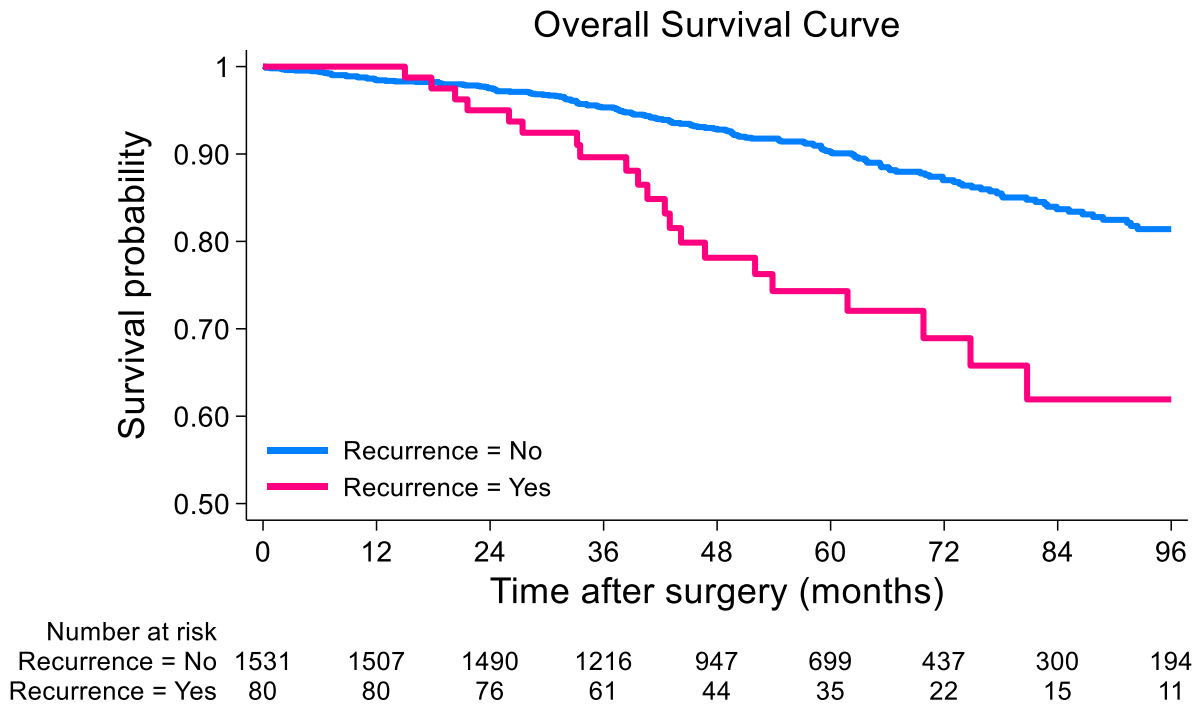

**Supplementary Figure 3.** Kaplan Meier estimates of RFS for patients with pT1 vs. pT2 colorectal cancer (p=0.006).

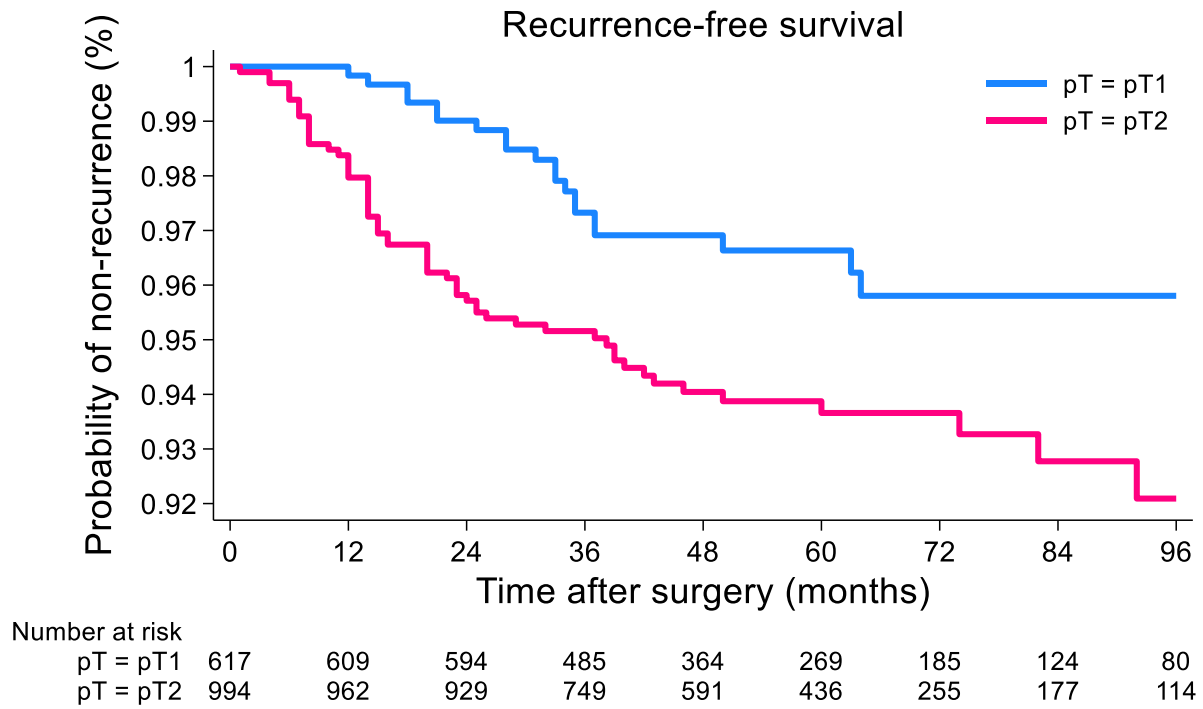

**Supplementary Figure 4.** Hazard rates of colorectal cancer recurrence for patients with pT1 vs pT2 colorectal cancer.

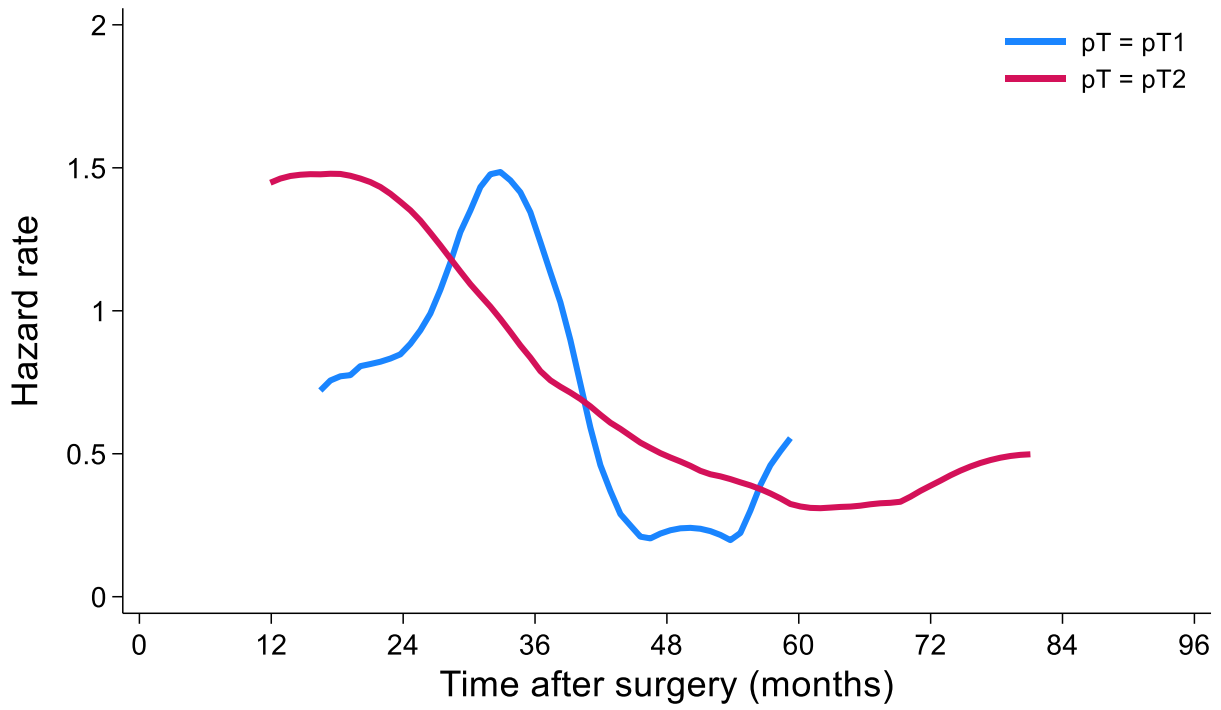

Supplement: as9-5-e510-s001.pdf [file as9-5-e510-s001.pdf]
